# Supplementary material for: Webbing a network of reliable thermochemistry around lignin building blocks: tri-methoxy-benzenes
Source: PubMed Central journal article supplement — RSC Adv. 2021 Mar 12;11(18):10727–37. doi: 10.1039/d1ra00690h (PMC8695713; doi:10.1039/d1ra00690h), 2021-03-12
Supplement: RA-011-D1RA00690H-s001.pdf [file RA-011-D1RA00690H-s001.pdf]

*Electronic supporting information*

*RSC Advances, 2021*

## Webbing a network of reliable thermochemistry around lignin building blocks: tri-methoxy-benzenes

Sergey P. Verevkin,<sup>a,b,\*</sup> Vladimir V. Turovtsev,<sup>c</sup> Irina V. Andreeva,<sup>a</sup> Yuriy D. Orlov,<sup>d</sup> Aleksey A. Pimerzin<sup>b</sup>

<sup>a</sup> Department of Physical Chemistry, University of Rostock, 18059 Rostock, Germany

<sup>b</sup> Chemical Department, Samara State Technical University, 443100 Samara, Russia

<sup>c</sup> Department of Physics, Tver State Medical University, 170100 Tver, Russia

<sup>d</sup> Physical-Technical Department, Tver State University, 170100 Tver, Russia

**Table S1**

Provenance, Purity, and Methods of Purification of Sample Used in This Work.

| Compound                  | State | Source        | Initial purity | Final purity <sup>a</sup> | Final purity <sup>b</sup> |
|---------------------------|-------|---------------|----------------|---------------------------|---------------------------|
| 1,2,3-tri-methoxy-benzene | cr    | TCI           | 0.99           | 0.9999                    | 0.9997                    |
| 1,2,4-tri-methoxy-benzene | liq   | TCI           | 0.98           | 0.9997                    |                           |
| 1,3,5-tri-methoxy-benzene | cr    | Sigma-Aldrich | 0.99           | 0.9999                    | 0.9999                    |
| 3,4,5-tri-methoxy-toluene | liq   | Alfa-Aesar    | 0.98           | 0.9997                    |                           |

<sup>a</sup> Solid samples were purified by using fractional sublimation at reduced pressure. Liquid samples were purified by using vacuum fractional distillation. Mass fraction impurity determined by the gas chromatography. Not significant mass fraction of water at the level of 15-20 ppm (detection level of the KF titration) was detected by the Karl Fisher titration. The final purities are given on the water-free basis.

<sup>b</sup> Mass fraction impurity determined by the differential scanning calorimetry

**Table S2.**

Compilation of data on molar heat capacities  $C_{p,m}^o$ (cr or liq) and heat capacity differences  $\Delta_{cr,l}^g C_{p,m}^o$  (in J·K<sup>-1</sup>·mol<sup>-1</sup>) at  $T = 298.15$  K for the methoxy-substituted benzenes

| Compounds                 | $C_{p,m}^o$ (cr) <sub>a</sub> | $-\Delta_{cr}^g C_{p,m}^o$ <sub>b</sub> | $C_{p,m}^o$ (liq) <sub>a</sub> | $-\Delta_l^g C_{p,m}^o$ <sub>b</sub> |
|---------------------------|-------------------------------|-----------------------------------------|--------------------------------|--------------------------------------|
| 1,2,3-tri-methoxy-benzene | 243.3 <sup>c</sup>            | 37.2                                    | 335.7                          | 97.9                                 |
| 1,2,4-tri-methoxy-benzene | 243.3                         | 37.2                                    | 335.7                          | 97.9                                 |
| 1,3,5-tri-methoxy-benzene | 243.3                         | 37.2                                    | 335.7                          | 97.9                                 |
| 3,4,5-tri-methoxy-toluene | 270.9                         | 41.4                                    | 364.1                          | 105.2                                |

<sup>a</sup> Calculated by the group-contribution procedure developed by Chickos *et al.*<sup>1,2</sup>. We used the contribution for the methoxy group 39.9 J·K<sup>-1</sup>·mol<sup>-1</sup> (liq). The latter contribution was derived from the experimental value  $C_{p,m}^o$ (liq) = 199.0 J·K<sup>-1</sup>·mol<sup>-1</sup> of methoxybenzene.<sup>3</sup>

<sup>b</sup> Calculated according to the procedure developed by Chickos and Acree.<sup>2</sup>

<sup>c</sup> For comparison the experimental value  $C_{p,m}^o$ (cr, 298.15 K) = 240.9 J·K<sup>-1</sup>·mol<sup>-1</sup> (see Table S3).

**Heat capacity measurements.** We used PerkinElmer DSC Pyris 1. The experimental protocol of heat capacity determination included the three equal iterations with an empty pan, a reference sample of sapphire and a sample of each compound being researched. For each iteration there was an equal thermal program of study; for all steps of each measurement the same pan was used. In each iteration the sample was heated with the step of 50 K at heating rate of 10 K·min<sup>-1</sup>. Before and after each scanning step sample was kept isothermally for two minutes. Inside each iteration the temperature range was divided into intervals of 50 K to heat samples and between them there was a shift of 25 K. Each step for all iterations was repeated 4 times.

The heat capacity was derived with the Perkin Elmer software. The heat capacity determination technique was tested with a reference sample of benzoic acid by Parr Instrument Company. In the chosen temperature range the experimental values agreed with the reference values within ±1 %. The expanded uncertainty (k = 2) for the heat capacity measured by this method was estimated to be 0.02 ×  $C_{p,m}^o$ . See for more details ref. [4].

**Table S3** Compilation of data on molar heat capacities  $C_{p,m}^o$ (cr or liq) (in J·K<sup>-1</sup>·mol<sup>-1</sup>) at  $T = 298.15$  K for 1,2,3-trimethoxy-benzene

| $T$ , K | $C_{p,m}^o$ (cr) <sup>a</sup> | $T$ , K | $C_{p,m}^o$ (liq) |
|---------|-------------------------------|---------|-------------------|
| 238     | 201.86                        | 335     | 343.11            |
| 241     | 203.33                        | 337     | 343.65            |
| 246     | 206.31                        | 340     | 344.66            |
| 251     | 209.40                        | 343     | 345.62            |
| 256     | 212.56                        | 346     | 346.61            |
| 261     | 216.16                        | 349     | 347.49            |
| 266     | 219.67                        | 335     | 343.11            |
| 271     | 222.89                        | 337     | 343.65            |
| 276     | 226.60                        |         |                   |
| 281     | 230.43                        |         |                   |
| 286     | 233.98                        |         |                   |
| 291     | 235.94                        |         |                   |
| 296     | 238.98                        |         |                   |

<sup>a</sup> The experimental data were fitted with the following equation:

$$C_{p,m}^o(cr)/R = 0.0311 + 4.734 \times 10^{-4}(T/K) \text{ from } 238 \text{ to } 296 \text{ K (with } R = 8.314462 \text{ J}\cdot\text{K}^{-1}\cdot\text{mol}^{-1}\text{)}.$$

$$C_{p,m}^o(cr, 298.15 \text{ K}) = 240.9 \text{ J}\cdot\text{K}^{-1}\cdot\text{mol}^{-1}$$

**Transpiration Method.** Vapour pressures were measured using the transpiration method. About 0.8 g of the sample was mixed with small glass beads and placed in the thermostatted U-shaped saturator. A stream of N<sub>2</sub> with a well-defined flow rate was passed through the saturator at constant temperature (± 0.1 K), and the transported material was collected in a cold trap. The amount of condensed substance was determined by GC. The saturation vapour pressure  $p_i$  at each temperature  $T_i$  was calculated from the amount of product collected within a definite period of time:

$$p_i = m_i \cdot R \cdot T_a / V \cdot M_i ; \quad V = (n_{N_2} + n_i) \cdot R \cdot T_a / P_a \quad (S1),$$

where  $V$  is the volume of the gas phase consisting of the  $n_{N_2}$  moles of the carrier gas and  $n_i$  mole of gaseous compound under study at the atmospheric pressure  $P_a$  and the ambient temperature  $T_a$ . The volume of the carrier gas  $V_{N_2}$  was determined by the digital flow rate sensor from integration with a microcontroller. We used the Honeywell S&C - HAFBLF0200C2AX5 digital flow rate sensor with uncertainty at the level of 2.5 %. The flow rate of the nitrogen stream was also controlled by using a soap bubble flow meter (HP soap film flowmeter (model 0101-0113)) and

optimized in order to reach the saturation equilibrium of the transporting gas at each temperature under study. The volume of the carrier gas  $V_{N_2}$  was readied from the digital flow rate sensor. The amount of the compound under study  $n_i$  in the carrier gas was estimated applying the ideal gas law at each temperature. Prior to the beginning the vapour pressure measurements, the pre-conditioning of the sample was performed first at (293-300) K (one hour) in order to withdraw possible water traces. Then the saturator was kept at 310-315 K (in order to remove possible traces of volatile compounds). In order to ascertain the completing of pre-conditioning, three samples were taken during the sample flashing at a suitable temperature and analysed by the GC. A constant vapour pressure at this temperature indicated that the transpiration experiments could start. No additional impurities were detected by the GC analysis of the transported material. The absence of impurities and decomposition products was rechecked by GC analysis of the saturator content after completing of the whole series of experiments. The primary experimental data are given in Table S4. See for more details refs. [5,6].

**Table S4**

Results from the Transpiration Method: Absolute Vapour Pressures  $p_i$ , Standard Molar Sublimation/Vaporization Enthalpies  $\Delta_{cr/l}^g H_m^o$  and Standard Molar Sublimation/Vaporization Entropies  $\Delta_{cr/l}^g S_m^o$

| $T/$<br>K <sup>a</sup>                                                                                              | $m/$<br>mg <sup>b</sup> | $V(N_2)^c /$<br>dm <sup>3</sup> | $T_a/$<br>K <sup>d</sup> | Flow/<br>dm <sup>3</sup> ·h <sup>-1</sup> | $p_i/$<br>Pa <sup>e</sup> | $u(p_i)/$<br>Pa <sup>f</sup> | $\Delta_{cr/l}^g H_m^o(T)/$<br>kJ·mol <sup>-1</sup> | $\Delta_{cr/l}^g S_m^o(T)/$<br>J·K <sup>-1</sup> ·mol <sup>-1</sup> |
|---------------------------------------------------------------------------------------------------------------------|-------------------------|---------------------------------|--------------------------|-------------------------------------------|---------------------------|------------------------------|-----------------------------------------------------|---------------------------------------------------------------------|
| 1,2,3-trimethoxy-benzene, $\Delta_{cr/l}^g H_m^o(298.15 \text{ K}) = (92.4 \pm 0.7) \text{ kJ}\cdot\text{mol}^{-1}$ |                         |                                 |                          |                                           |                           |                              |                                                     |                                                                     |
| $\ln(p_i/p_{ref}) = \frac{348.4}{R} - \frac{103491.0}{RT} - \frac{37.2}{R} \ln \frac{T}{298.15}$                    |                         |                                 |                          |                                           |                           |                              |                                                     |                                                                     |
| 288.2                                                                                                               | 2.25                    | 102.929                         | 295.6                    | 2.57                                      | 0.32                      | 0.01                         | 92.8                                                | 216.7                                                               |
| 291.2                                                                                                               | 1.67                    | 51.023                          | 295.6                    | 2.59                                      | 0.48                      | 0.02                         | 92.7                                                | 216.4                                                               |
| 294.3                                                                                                               | 1.51                    | 31.166                          | 295.6                    | 2.59                                      | 0.71                      | 0.02                         | 92.5                                                | 215.9                                                               |
| 297.2                                                                                                               | 1.19                    | 16.662                          | 295.6                    | 2.59                                      | 1.05                      | 0.03                         | 92.4                                                | 215.7                                                               |
| 300.3                                                                                                               | 0.69                    | 6.734                           | 295.6                    | 2.59                                      | 1.49                      | 0.04                         | 92.3                                                | 215.1                                                               |
| 303.2                                                                                                               | 0.97                    | 6.561                           | 295.6                    | 2.59                                      | 2.17                      | 0.06                         | 92.2                                                | 214.9                                                               |
| 306.3                                                                                                               | 1.22                    | 5.784                           | 295.6                    | 2.59                                      | 3.08                      | 0.08                         | 92.1                                                | 214.3                                                               |
| 308.3                                                                                                               | 1.50                    | 5.525                           | 295.6                    | 2.59                                      | 3.95                      | 0.10                         | 92.0                                                | 214.2                                                               |
| 310.3                                                                                                               | 1.45                    | 4.144                           | 295.6                    | 2.59                                      | 5.11                      | 0.15                         | 91.9                                                | 214.2                                                               |
| 312.3                                                                                                               | 1.35                    | 3.151                           | 295.6                    | 2.59                                      | 6.24                      | 0.18                         | 91.9                                                | 213.7                                                               |
| 314.3                                                                                                               | 1.19                    | 2.245                           | 295.6                    | 2.59                                      | 7.78                      | 0.22                         | 91.8                                                | 213.5                                                               |
| 1,2,3-trimethoxy-benzene, $\Delta_{cr/l}^g H_m^o(298.15 \text{ K}) = (73.0 \pm 0.5) \text{ kJ}\cdot\text{mol}^{-1}$ |                         |                                 |                          |                                           |                           |                              |                                                     |                                                                     |
| $\ln(p_i/p_{ref}) = \frac{348.3}{R} - \frac{102212.3}{RT} - \frac{97.9}{R} \ln \frac{T}{298.15}$                    |                         |                                 |                          |                                           |                           |                              |                                                     |                                                                     |
| 318.1                                                                                                               | 1.09                    | 1.360                           | 295.5                    | 2.59                                      | 11.75                     | 0.32                         | 71.1                                                | 148.2                                                               |
| 321.2                                                                                                               | 1.50                    | 1.425                           | 295.5                    | 2.59                                      | 15.33                     | 0.41                         | 70.8                                                | 147.3                                                               |
| 324.3                                                                                                               | 1.45                    | 1.079                           | 295.5                    | 2.59                                      | 19.61                     | 0.52                         | 70.5                                                | 146.3                                                               |
| 327.2                                                                                                               | 1.70                    | 0.993                           | 295.5                    | 2.59                                      | 25.06                     | 0.65                         | 70.2                                                | 145.6                                                               |
| 331.2                                                                                                               | 2.25                    | 0.950                           | 295.5                    | 2.59                                      | 34.56                     | 0.89                         | 69.8                                                | 144.5                                                               |
| 334.3                                                                                                               | 2.58                    | 0.863                           | 295.5                    | 2.59                                      | 43.68                     | 1.12                         | 69.5                                                | 143.6                                                               |
| 337.3                                                                                                               | 2.51                    | 0.691                           | 295.5                    | 2.59                                      | 53.13                     | 1.35                         | 69.2                                                | 142.5                                                               |
| 340.2                                                                                                               | 3.09                    | 0.691                           | 295.5                    | 2.59                                      | 65.35                     | 1.66                         | 68.9                                                | 141.6                                                               |
| 343.1                                                                                                               | 2.88                    | 0.518                           | 295.5                    | 2.59                                      | 81.25                     | 2.06                         | 68.6                                                | 140.9                                                               |
| 346.3                                                                                                               | 2.25                    | 0.324                           | 295.5                    | 2.59                                      | 101.3                     | 2.56                         | 68.3                                                | 140.0                                                               |

1,2,4-trimethoxy-benzene,  $\Delta_l^g H_m^o(298.15 \text{ K}) = (75.7 \pm 0.5) \text{ kJ}\cdot\text{mol}^{-1}$

$$\ln(p_i/p_{ref}) = \frac{350.8}{R} - \frac{104844.6}{RT} - \frac{97.9}{R} \ln \frac{T}{298.15}$$

|       |      |       |       |      |       |      |      |       |
|-------|------|-------|-------|------|-------|------|------|-------|
| 309.7 | 0.73 | 3.788 | 293.8 | 3.99 | 2.81  | 0.08 | 74.5 | 153.5 |
| 314.1 | 0.77 | 2.649 | 294.4 | 3.97 | 4.22  | 0.11 | 74.1 | 152.1 |
| 319.2 | 0.69 | 1.527 | 294.9 | 3.98 | 6.56  | 0.19 | 73.6 | 150.5 |
| 324.2 | 0.64 | 0.945 | 294.9 | 2.98 | 9.89  | 0.27 | 73.1 | 148.9 |
| 329.1 | 0.73 | 0.704 | 294.7 | 2.01 | 15.16 | 0.40 | 72.6 | 147.6 |
| 329.2 | 1.04 | 1.000 | 301.2 | 3.00 | 15.48 | 0.41 | 72.6 | 147.7 |
| 329.2 | 0.79 | 0.751 | 300.8 | 3.01 | 15.66 | 0.42 | 72.6 | 147.8 |
| 332.1 | 0.74 | 0.560 | 297.0 | 1.98 | 19.33 | 0.51 | 72.3 | 146.7 |
| 332.1 | 0.77 | 0.616 | 301.8 | 1.48 | 18.53 | 0.49 | 72.3 | 146.3 |
| 334.2 | 0.76 | 0.503 | 295.0 | 2.01 | 21.91 | 0.57 | 72.1 | 145.8 |
| 335.2 | 0.82 | 0.497 | 301.4 | 1.99 | 24.52 | 0.64 | 72.0 | 145.8 |
| 338.2 | 0.77 | 0.381 | 300.9 | 1.00 | 29.91 | 0.77 | 71.7 | 144.7 |
| 339.2 | 0.70 | 0.314 | 294.7 | 0.99 | 32.47 | 0.84 | 71.6 | 144.5 |
| 341.2 | 0.75 | 0.296 | 300.3 | 0.99 | 37.54 | 0.96 | 71.4 | 143.8 |
| 342.1 | 1.37 | 0.496 | 298.2 | 0.99 | 40.83 | 1.05 | 71.4 | 143.7 |
| 344.1 | 0.80 | 0.248 | 294.7 | 0.99 | 46.72 | 1.19 | 71.2 | 143.0 |
| 344.1 | 0.81 | 0.254 | 300.6 | 0.98 | 47.66 | 1.22 | 71.2 | 143.2 |
| 345.2 | 1.03 | 0.298 | 298.1 | 0.99 | 51.15 | 1.30 | 71.1 | 142.8 |
| 347.1 | 0.99 | 0.248 | 295.0 | 0.99 | 58.21 | 1.48 | 70.9 | 142.2 |
| 348.2 | 1.08 | 0.247 | 297.0 | 0.99 | 64.30 | 1.63 | 70.8 | 142.1 |
| 350.1 | 1.19 | 0.231 | 294.8 | 0.99 | 75.17 | 1.90 | 70.6 | 141.8 |

1,3,5-trimethoxy-benzene,  $\Delta_{cr}^g H_m^o(298.15 \text{ K}) = (90.3 \pm 0.5) \text{ kJ}\cdot\text{mol}^{-1}$

$$\ln(p_i/p_{ref}) = \frac{333.9}{R} - \frac{101366.0}{RT} - \frac{37.2}{R} \ln \frac{T}{298.15}$$

|       |      |        |       |      |       |      |      |       |
|-------|------|--------|-------|------|-------|------|------|-------|
| 288.0 | 0.67 | 72.497 | 296.3 | 4.78 | 0.13  | 0.01 | 90.7 | 202.4 |
| 296.3 | 0.56 | 21.351 | 296.3 | 4.78 | 0.39  | 0.01 | 90.3 | 201.3 |
| 298.7 | 0.63 | 18.288 | 296.3 | 5.08 | 0.51  | 0.02 | 90.3 | 200.9 |
| 303.2 | 0.83 | 13.801 | 296.3 | 5.08 | 0.88  | 0.03 | 90.1 | 200.4 |
| 304.2 | 1.03 | 15.750 | 296.3 | 6.30 | 0.96  | 0.03 | 90.1 | 200.0 |
| 307.2 | 0.90 | 9.450  | 296.3 | 6.30 | 1.40  | 0.04 | 89.9 | 199.9 |
| 308.2 | 0.49 | 4.741  | 296.3 | 5.08 | 1.52  | 0.04 | 89.9 | 199.5 |
| 311.4 | 1.23 | 7.770  | 296.3 | 6.30 | 2.31  | 0.06 | 89.8 | 199.6 |
| 314.4 | 1.10 | 5.145  | 296.3 | 6.30 | 3.12  | 0.08 | 89.7 | 199.0 |
| 316.5 | 0.90 | 3.330  | 296.3 | 3.77 | 3.96  | 0.10 | 89.6 | 198.8 |
| 317.4 | 1.19 | 4.148  | 296.3 | 6.30 | 4.21  | 0.11 | 89.6 | 198.4 |
| 319.5 | 1.11 | 2.953  | 296.3 | 3.77 | 5.50  | 0.16 | 89.5 | 198.6 |
| 320.2 | 1.24 | 3.150  | 296.3 | 6.30 | 5.79  | 0.17 | 89.5 | 198.3 |
| 323.2 | 1.24 | 2.310  | 296.3 | 6.30 | 7.89  | 0.22 | 89.3 | 197.9 |
| 325.5 | 1.75 | 2.513  | 296.3 | 3.77 | 10.18 | 0.28 | 89.3 | 197.8 |
| 326.2 | 1.10 | 1.470  | 296.3 | 6.30 | 10.93 | 0.30 | 89.2 | 197.8 |

1,3,5-trimethoxy-benzene,  $\Delta_l^g H_m^o(298.15 \text{ K}) = (68.7 \pm 0.4) \text{ kJ}\cdot\text{mol}^{-1}$

$$\ln(p_i/p_{ref}) = \frac{329.3}{R} - \frac{97850.6}{RT} - \frac{97.9}{R} \ln \frac{T}{298.15}$$

|       |      |       |       |      |       |      |      |       |
|-------|------|-------|-------|------|-------|------|------|-------|
| 330.5 | 0.57 | 0.512 | 296.2 | 1.06 | 16.36 | 0.43 | 65.5 | 125.7 |
| 331.2 | 0.62 | 0.539 | 296.2 | 1.06 | 16.92 | 0.45 | 65.4 | 125.4 |
| 333.5 | 0.69 | 0.504 | 296.2 | 1.06 | 20.11 | 0.53 | 65.2 | 124.8 |
| 336.3 | 0.81 | 0.477 | 296.2 | 1.06 | 24.78 | 0.64 | 64.9 | 124.1 |
| 337.3 | 1.13 | 0.636 | 296.2 | 1.06 | 25.96 | 0.67 | 64.8 | 123.6 |
| 339.4 | 0.83 | 0.406 | 296.2 | 1.06 | 30.02 | 0.78 | 64.6 | 123.0 |

|       |      |       |       |      |       |      |      |       |
|-------|------|-------|-------|------|-------|------|------|-------|
| 341.4 | 0.98 | 0.415 | 296.2 | 1.06 | 34.42 | 0.89 | 64.4 | 122.5 |
| 342.3 | 1.12 | 0.451 | 296.2 | 1.06 | 36.26 | 0.93 | 64.3 | 122.1 |
| 345.3 | 0.79 | 0.265 | 296.2 | 1.06 | 43.89 | 1.12 | 64.1 | 121.2 |
| 346.3 | 1.09 | 0.336 | 296.2 | 1.06 | 47.52 | 1.21 | 64.0 | 121.1 |
| 348.3 | 0.84 | 0.230 | 296.2 | 1.06 | 53.37 | 1.36 | 63.8 | 120.4 |
| 350.3 | 1.23 | 0.292 | 296.2 | 1.06 | 61.68 | 1.57 | 63.6 | 120.0 |
| 351.4 | 1.01 | 0.230 | 296.2 | 1.06 | 64.54 | 1.64 | 63.5 | 119.5 |
| 354.4 | 0.93 | 0.173 | 296.2 | 1.06 | 78.50 | 1.99 | 63.2 | 118.8 |
| 355.4 | 1.44 | 0.247 | 296.2 | 1.06 | 85.01 | 2.15 | 63.1 | 118.7 |
| 357.5 | 1.13 | 0.177 | 296.2 | 1.06 | 93.91 | 2.37 | 62.9 | 117.9 |
| 359.4 | 1.52 | 0.212 | 296.2 | 1.06 | 104.8 | 2.65 | 62.7 | 117.4 |
| 360.6 | 1.38 | 0.177 | 296.2 | 1.06 | 113.9 | 2.87 | 62.6 | 117.1 |
| 363.6 | 1.59 | 0.177 | 296.2 | 1.06 | 131.7 | 3.32 | 62.3 | 116.1 |
| 364.3 | 1.70 | 0.177 | 296.2 | 1.06 | 140.9 | 3.55 | 62.2 | 116.2 |
| 366.6 | 1.82 | 0.168 | 296.2 | 1.06 | 158.1 | 3.98 | 62.0 | 115.4 |
| 368.5 | 1.90 | 0.159 | 296.2 | 1.06 | 174.5 | 4.39 | 61.8 | 114.9 |
| 369.3 | 1.87 | 0.150 | 296.2 | 1.06 | 182.1 | 4.58 | 61.7 | 114.6 |
| 371.4 | 2.17 | 0.150 | 296.2 | 1.06 | 211.1 | 5.30 | 61.5 | 114.4 |
| 372.4 | 2.11 | 0.141 | 296.2 | 1.06 | 218.5 | 5.49 | 61.4 | 114.0 |
| 374.3 | 2.15 | 0.129 | 296.2 | 1.06 | 243.6 | 6.11 | 61.2 | 113.5 |
| 375.3 | 2.34 | 0.133 | 296.2 | 1.06 | 257.6 | 6.47 | 61.1 | 113.3 |

3,4,5-trimethoxy-toluene,  $\Delta_l^g H_m^o(298.15 \text{ K}) = (77.7 \pm 0.5) \text{ kJ}\cdot\text{mol}^{-1}$

$$\ln(p_i/p_{ref}) = \frac{366.9}{R} - \frac{109273.7}{RT} - \frac{105.8}{R} \ln \frac{T}{298.15}$$

|       |      |       |       |      |       |      |      |       |
|-------|------|-------|-------|------|-------|------|------|-------|
| 327.2 | 2.90 | 3.413 | 294.8 | 4.45 | 15.99 | 0.42 | 74.7 | 155.5 |
| 329.2 | 2.69 | 2.691 | 296.4 | 4.25 | 18.92 | 0.50 | 74.4 | 154.9 |
| 331.1 | 2.68 | 2.277 | 295.0 | 4.27 | 22.15 | 0.58 | 74.2 | 154.3 |
| 334.1 | 2.81 | 1.851 | 294.6 | 4.44 | 28.60 | 0.74 | 73.9 | 153.4 |
| 336.5 | 2.70 | 1.545 | 294.2 | 4.64 | 32.78 | 0.84 | 73.7 | 152.2 |
| 339.1 | 2.74 | 1.257 | 295.2 | 4.71 | 41.12 | 1.05 | 73.4 | 151.7 |
| 342.0 | 1.96 | 0.711 | 293.4 | 2.13 | 51.58 | 1.31 | 73.1 | 150.8 |
| 343.9 | 2.72 | 0.865 | 295.0 | 2.08 | 59.30 | 1.51 | 72.9 | 150.2 |
| 346.4 | 2.61 | 0.671 | 295.4 | 2.01 | 73.23 | 1.86 | 72.6 | 149.7 |
| 348.9 | 3.30 | 0.719 | 297.6 | 2.16 | 87.32 | 2.21 | 72.4 | 148.9 |
| 352.1 | 2.72 | 0.474 | 294.6 | 1.24 | 107.7 | 2.72 | 72.0 | 147.7 |
| 355.0 | 2.88 | 0.420 | 298.4 | 1.68 | 130.4 | 3.29 | 71.7 | 146.8 |
| 358.1 | 2.60 | 0.308 | 295.4 | 1.23 | 158.9 | 4.00 | 71.4 | 145.8 |
| 360.9 | 2.62 | 0.254 | 296.4 | 1.02 | 194.9 | 4.90 | 71.1 | 145.1 |
| 364.2 | 3.12 | 0.241 | 295.2 | 1.00 | 243.6 | 6.12 | 70.7 | 144.2 |
| 366.2 | 3.51 | 0.239 | 295.6 | 0.99 | 276.3 | 6.93 | 70.5 | 143.7 |

<sup>a</sup> Saturation temperature ( $u(T) = 0.1 \text{ K}$ ).

<sup>b</sup> Mass of transferred sample condensed at  $T = 243 \text{ K}$ .

<sup>c</sup> Volume of nitrogen ( $u(V) = 0.005 \text{ dm}^3$ ) used to transfer  $m$  ( $u(m) = 0.0001 \text{ g}$ ) of the sample.

<sup>d</sup>  $T_a$  is the temperature of the soap bubble meter used for measurement of the gas flow.

<sup>e</sup> Vapour pressure at temperature  $T$ , calculated from the  $m$  and the residual vapour pressure at the condensation temperature calculated by an iteration procedure.

<sup>f</sup> Uncertainties were calculated with  $u(p_i/\text{Pa}) = 0.005 + 0.025(p_i/\text{Pa})$  for pressures below 5 Pa and with  $u(p_i/\text{Pa}) = 0.025 + 0.025(p_i/\text{Pa})$  for pressures from 5 to 3000 Pa. The uncertainties for  $T$ ,  $V$ ,  $p$ ,  $m$ , and  $\Delta_l^g H_m^o$  are standard uncertainties with 0.683 confidence level, calculated according to procedure described elsewhere.<sup>6-7</sup> The standard uncertainty of vaporization enthalpy  $u(\Delta_l^g H_m^o)$  includes uncertainties from transpiration experimental conditions, uncertainties of vapour

pressure, uncertainties from fitting equation, and uncertainties from temperature adjustment to  $T = 298.15$  K.

**Correlations of vaporization enthalpies with gas-chromatographic indices.** The Kovats's retention index,  $J_x$ , is calculated with help of retention times of  $n$ -alkanes used as standards:<sup>8</sup>

$$J_x = \frac{\lg(t_x) - \lg^{[ref]}(t_N)}{\lg(t_{N+1}) - \lg^{[ref]}(t_N)} \times 100 + 100N$$

(S1),

where  $x$  refers to the adjusted retention time  $t$ ,  $N$  is the number of carbon atoms of the  $n$ -alkane eluting before, and  $(N + 1)$  is the number of carbon atoms of the  $n$ -alkane eluting after the peak of interest. Thus, the retention time  $t_x$  of the compound of interest  $x$  is encompassed by retention times of the two  $n$ -alkanes. According to the established GC procedure, all retention times are corrected for the "dead" retention time (the retention time of a non-retained component: dichloromethane or methane).<sup>9</sup>

**Combustion calorimetry.** The liquid samples were encapsulated in small polyethylene ampoules. The solid samples were pressed in pellets. All weightings were performed by using a microbalance with  $10^{-6}$  g resolution. The bomb was not pre-purged with  $O_2$ . Test experiments with and without purging with  $O_2$  showed results consistent within the experimental uncertainty. Samples were ignited at 3.04 MPa initial oxygen pressure adjusted to 298.15 K. The combustion products were examined for carbon monoxide (Dräger tube) and unburned carbon, but neither was detected. The energy equivalent of the calorimeter  $\varepsilon_{\text{calor}}$  was determined with a standard reference sample of benzoic acid (sample SRM 39j, NIST). Correction for nitric acid ( $HNO_3$ ) formation was based on titration with  $0.1 \text{ mol} \cdot \text{dm}^{-3}$  NaOH(aq). Auxiliary data required for the reduction are presented in Table S5. See for more details in refs. [10,11].

**Table S5.**

Formula, density  $\rho$  ( $T = 293$  K), massic heat capacity  $c_p$  ( $T = 298.15$  K), of the materials used in the present study.

| Compounds                       | Formula               | $\rho$                          | $c_p^a$                                      |
|---------------------------------|-----------------------|---------------------------------|----------------------------------------------|
|                                 |                       | $\text{g} \cdot \text{cm}^{-3}$ | $\text{J} \cdot \text{K}^{-1} \text{g}^{-1}$ |
| 1,2,3-tri-methoxy-benzene (cr)  | $C_9H_{12}O_3$        | 1.11 [12]                       | 1.45                                         |
| 1,2,4-tri-methoxy-benzene (liq) | $C_9H_{12}O_3$        | 1.13 [13]                       | 1.99                                         |
| 3,4,5-tri-methoxy-toluene (liq) | $C_{10}H_{14}O_3$     | 1.08[14]                        | 2.00                                         |
| polyethylene <sup>b</sup>       | $CH_{1.93}$           | 0.92                            | 2.53                                         |
| cotton <sup>b</sup>             | $CH_{1.774}O_{0.887}$ | 1.50                            | 1.67                                         |

<sup>a</sup> Estimated by group-contribution method (see Table S2)

<sup>b</sup> Data for density, specific heat capacity, and expansion coefficients of auxiliary materials are from our previous work:<sup>15</sup> specific energy of combustion  $\Delta_c u^\circ(\text{cotton}) = -16945.2 \text{ J} \cdot \text{g}^{-1}$ ;  $u(\Delta_c u^\circ) = 4.2 \text{ J} \cdot \text{g}^{-1}$ . The specific energy of combustion  $\Delta_c u^\circ(\text{polyethylene}) = -46354.6 \text{ J} \cdot \text{g}^{-1}$ ;  $u(\Delta_c u^\circ) = 3.1 \text{ J} \cdot \text{g}^{-1}$  was derived from ten combustion experiments performed in this work. The standard uncertainties are reported for the specific energies of combustion.

**Table S6.** Results for Typical Combustion Experiments at  $T = 298.15$  K ( $p^\circ = 0.1$  MPa) of the Substituted Benzenes <sup>a</sup>

|                                                              | 1,2,3-trimethoxybenzene | 1,2,4-trimethoxybenzene | 3,4,5-trimethoxytoluene |
|--------------------------------------------------------------|-------------------------|-------------------------|-------------------------|
| $m$ (substance) /g                                           | 0.395761                | 0.310990                | 0.282183                |
| $m'$ (cotton) /g                                             | 0.002210                | 0.001256                | 0.001238                |
| $m''$ (polyethylene) /g                                      | -                       | 0.239774                | 0.236263                |
| $T_i$ /K                                                     | 298.13267               | 298.15260               | 298.14147               |
| $T_f$ /K                                                     | 298.97204               | 299.56601               | 299.51592               |
| $\Delta T_c$ /K                                              | 0.76814                 | 1.35641                 | 1.31562                 |
| $(\epsilon_{\text{calor}}) \cdot (-\Delta T_c)$ /J           | -11367.26               | -20072.66               | -19469.03               |
| $(\epsilon_{\text{cont}}) \cdot (-\Delta T_c)$ /J            | -12.04                  | -30.76                  | -27.64                  |
| $\Delta U_{\text{decomp HNO}_3}$ /J                          | 3.58                    | 50.17                   | 44.2                    |
| $\Delta U_{\text{corr}}$ /J                                  | 6.37                    | 10.32                   | 8.95                    |
| $-m' \cdot \Delta_c u'$ /J                                   | 37.45                   | 21.28                   | 20.98                   |
| $-m'' \cdot \Delta_c u''$ /J                                 | -                       | 11114.63                | 10951.88                |
| $\Delta_c u^\circ$ (liq) /( $\text{J} \cdot \text{g}^{-1}$ ) | -28633.2                | -28640.8                | -30018.3                |

<sup>a</sup> Results are referenced to  $T = 298.15$  K ( $p^\circ = 0.1$  MPa). The definition of the symbols assigned according to ref.<sup>16,17</sup> as follows:  $m$ (substance),  $m'$ (cotton) and  $m''$ (polyethylene) are, respectively, the mass of compound burnt, the mass of fuse (cotton) and auxiliary polyethylene used in each experiment, masses were corrected for buoyancy;  $V$ (bomb) = 0.32 dm<sup>3</sup> is the internal volume of the calorimetric bomb;  $p^i$ (gas) = 3.04 MPa is the initial oxygen pressure in the bomb;  $m^i$ (H<sub>2</sub>O) = 1.00 g is the mass of water added to the bomb for dissolution of combustion gases;  $\epsilon_{\text{calor}} = (14798.37 \pm 0.83)$  J·K<sup>-1</sup>, uncertainty for the energy equivalent is expressed as the standard uncertainty;  $\Delta T^c = T^f - T^i + \Delta T_{\text{corr}}$  is the corrected temperature rise from initial temperature  $T^i$  to final temperature  $T^f$ , with the correction  $\Delta T_{\text{corr}}$  for heat exchange during the experiment;  $\epsilon_{\text{cont}}$  is the energy equivalents of the bomb contents in their initial  $\epsilon_{\text{cont}}^i$  and final states  $\epsilon_{\text{cont}}^f$ , the contribution for the bomb content is calculated with  $(\epsilon_{\text{cont}}) \cdot (-\Delta T_c) = (\epsilon_{\text{cont}}^i) \cdot (T^i - 298.15) + (\epsilon_{\text{cont}}^f) \cdot (298.15 - T^f + \Delta T_{\text{corr}})$ .  $\Delta U_{\text{decomp HNO}_3}$  is the energy correction for the nitric acid formation.  $\Delta U_{\text{corr}}$  is the correction to standard states. Auxiliary data are given in Table S5.

**Enthalpy of fusion measurements.** Thermal behavior of crystalline samples including melting temperatures and enthalpies of fusion was studied with a commercial Perkin-Elmer DSC Pyris-1. A sample was placed in the standard non-pinned aluminium pan of 40  $\mu\text{l}$  volume. Pan and sample were weighted with a microbalance with the standard uncertainty of  $5 \cdot 10^{-6}$  g. In the first DSC run the sample was heated with a rate  $10 \text{ K} \cdot \text{min}^{-1}$  to 398 K ( $\sim 30$  K above melting temperature provided by supplier) and then cooled down to 298 K, also with the rate  $10 \text{ K} \cdot \text{min}^{-1}$ . Such procedure provided sufficient contact between the sample and the bottom of pan. The DSC experiments were repeated three times. The calibration of the DSC was checked with melting behaviour of reference indium sample. The twice standard deviation of the enthalpy of fusion in the test measurements for reference compound was  $\pm 0.3 \text{ kJ} \cdot \text{mol}^{-1}$  and  $\pm 0.3$  K for the melting temperature. Uncertainties of the enthalpy of fusion values are expressed as expanded uncertainties (at a level of confidence of 0.95,  $k=2$ ). They include uncertainties from fusion experiment and calibration. Details are reported elsewhere [4].

As a rule, thermochemical calculations are commonly performed at the reference temperature  $T = 298.15$  K. The adjustment of  $\Delta_{\text{cr}}^l H_m^o(T_{\text{fus}})$  was performed with help of the equation [2]:

$$\Delta_{cr}^l H_m^o(298.15 \text{ K})/(\text{J}\cdot\text{mol}^{-1}) = \Delta_{cr}^l H_m^o(T_{\text{fus}}/\text{K}) - (\Delta_{cr}^g C_{p,m}^o - \Delta_l^g C_{p,m}^o) \times [(T_{\text{fus}}/\text{K}) - 298.15 \text{ K}] \quad (\text{S2})$$

where  $\Delta_{cr}^g C_{p,m}^o$  and  $\Delta_l^g C_{p,m}^o$  were taken from Table S2. With this adjustment, the molar enthalpies of fusion,  $\Delta_{cr}^l H_m^o(298.15 \text{ K})$  were calculated. Uncertainties in the temperature adjustment of fusion enthalpy from  $T_{\text{fus}}$  to the reference temperature were estimated to account with 30 % to the total adjustment [2].

**Table S7**

Thermochemical Data at  $T = 298.15 \text{ K}$  ( $p^\circ = 0.1 \text{ MPa}$ ) for Reference Compounds (in  $\text{kJ}\cdot\text{mol}^{-1}$ ).

|                 | $\Delta_f H_m^o(\text{liq})$ | $\Delta_f^g H_m^o$ | $\Delta_f H_m^o(\text{g})$ |
|-----------------|------------------------------|--------------------|----------------------------|
| benzene         | 49.0±0.9 [18]                | 33.9±0.1 [18]      | 82.9±0.9 [18]              |
| toluene         | 12.0±1.1 [18]                | 38.1±0.1 [18]      | 50.1±1.1 [18]              |
| methoxy-benzene | -117.1±1.4 [19]              | 46.4±0.3[19]       | -70.7±1.4[19]              |

**Table S8**

Experimental and Theoretical Gas-Phase Enthalpies of Formation  $\Delta_f H_m^o(\text{g})$  at  $T = 298.15 \text{ K}$  ( $p^\circ = 0.1 \text{ MPa}$ ) for Substituted Benzenes as Calculated by G4 Method (in  $\text{kJ}\cdot\text{mol}^{-1}$ ).

| compound                  | Exp. <sup>a</sup> | G4     |          | G4                    |          |
|---------------------------|-------------------|--------|----------|-----------------------|----------|
|                           |                   | AT     | calc-exp | AT(corr) <sup>b</sup> | calc-exp |
| 1,2,3-tri-methoxy-benzene | -346.0±2.0        | -355.1 | 9.1      | -351.8                | 5.8      |
| 1,2,4-tri-methoxy-benzene | -360.6±2.3        | -364.0 | 3.4      | -360.7                | 0.1      |
| 1,3,5-tri-methoxy-benzene | -381.6±3.2        | -385.2 | 3.6      | -382.0                | 0.4      |
| 3,4,5-tri-methoxy-toluene | -383.2±2.5        | -386.6 | 3.4      | -383.4                | 0.2      |

<sup>a</sup> From Table 8.

<sup>b</sup> Calculated by the G4 method according to the standard atomization procedure. (The expanded uncertainty assessed to be  $\pm 3.5 \text{ kJ}\cdot\text{mol}^{-1}$ ).<sup>20</sup>

<sup>c</sup> Results from atomization reactions were corrected with help of following equation:

$$\Delta_f H_m^o(\text{g})_{\text{theor}} / \text{kJ}\cdot\text{mol}^{-1} = 1.0023 \times \Delta_f H_m^o(\text{g, AT}) + 4.1 \quad \text{with } R^2 = 0.9992$$

**Table S9**

Experimental and Theoretical Gas-Phase Enthalpies of Formation  $\Delta_f H_m^o(\text{g})$  at  $T = 298.15 \text{ K}$  ( $p^\circ = 0.1 \text{ MPa}$ ) for Substituted Benzenes as Calculated by G3MP2 Method (in  $\text{kJ}\cdot\text{mol}^{-1}$ ).

| compound                  | Exp. <sup>a</sup> | G3MP2  |          | G3MP2                 |          |
|---------------------------|-------------------|--------|----------|-----------------------|----------|
|                           |                   | AT     | calc-exp | AT(corr) <sup>b</sup> | calc-exp |
| 1,2,3-tri-methoxy-benzene | -346.0±2.0        | -356.6 | 10.6     | -350.2                | 4.2      |
| 1,2,4-tri-methoxy-benzene | -360.6±2.3        | -366.2 | 5.6      | -359.8                | -0.8     |
| 1,3,5-tri-methoxy-benzene | -381.6±3.2        | -387.3 | 5.7      | -381.1                | -0.5     |
| 3,4,5-tri-methoxy-toluene | -383.2±2.5        | -388.5 | 5.3      | -382.3                | -0.9     |

<sup>a</sup> From Table 8.

<sup>b</sup> Calculated by the G3MP2 method according to the standard atomization procedure. (The expanded uncertainty assessed to be  $\pm 4.1 \text{ kJ}\cdot\text{mol}^{-1}$ ).<sup>21</sup>



<sup>c</sup> Results from atomization reactions were corrected with help of following equation:

$$\Delta_f H_{m(g)}^o / \text{kJ}\cdot\text{mol}^{-1} = 1.0064 \times \Delta_f H_{m(g, \text{AT})}^o + 8.7 \quad \text{with } R^2 = 0.9993$$

**Table S10**

Experimental and Theoretical Gas-Phase Enthalpies of Formation  $\Delta_f H_{m(g)}^o$  at  $T = 298.15 \text{ K}$  ( $p^\circ = 0.1 \text{ MPa}$ ) for Substituted Benzenes as Calculated by G4MP2 Method (in  $\text{kJ}\cdot\text{mol}^{-1}$ ).

| compound                  | Exp. <sup>a</sup> | M06/QZ4P |          | M06/QZ4P              |          |
|---------------------------|-------------------|----------|----------|-----------------------|----------|
|                           |                   | AT       | calc-exp | AT(corr) <sup>b</sup> | calc-exp |
| 1,2,3-tri-methoxy-benzene | -346.0±2.0        | -359.8   | 13.8     | -348.3                | 2.3      |
| 1,2,4-tri-methoxy-benzene | -360.6±2.3        | -370.3   | 9.7      | -358.5                | -2.1     |
| 1,3,5-tri-methoxy-benzene | -381.6±3.2        | -393.9   | 12.3     | -381.5                | -0.1     |

<sup>a</sup> From Table 8.

<sup>b</sup> Calculated by the M06/QZ4P method according to the standard atomization procedure. (The expanded uncertainty assessed to be  $\pm 3.5 \text{ kJ}\cdot\text{mol}^{-1}$ ).<sup>22</sup>.

<sup>c</sup> Results from atomization reactions were corrected with help of following equation:

$$\Delta_f H_{m(g)}^o / \text{kJ}\cdot\text{mol}^{-1} = 0.9739 \times \Delta_f H_{m(g, \text{AT})}^o + 2.1 \quad \text{with } R^2 = 0.9992$$

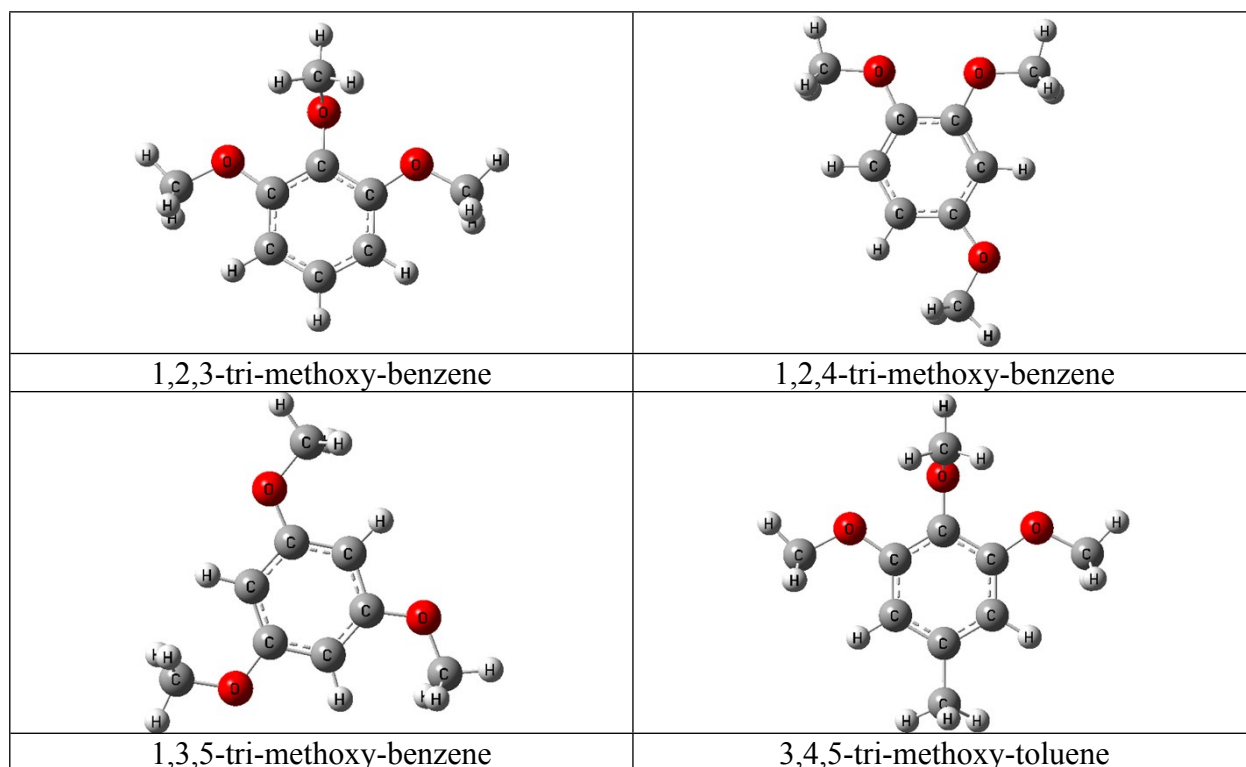

**Figure S1.** The most stable conformers of substituted benzenes

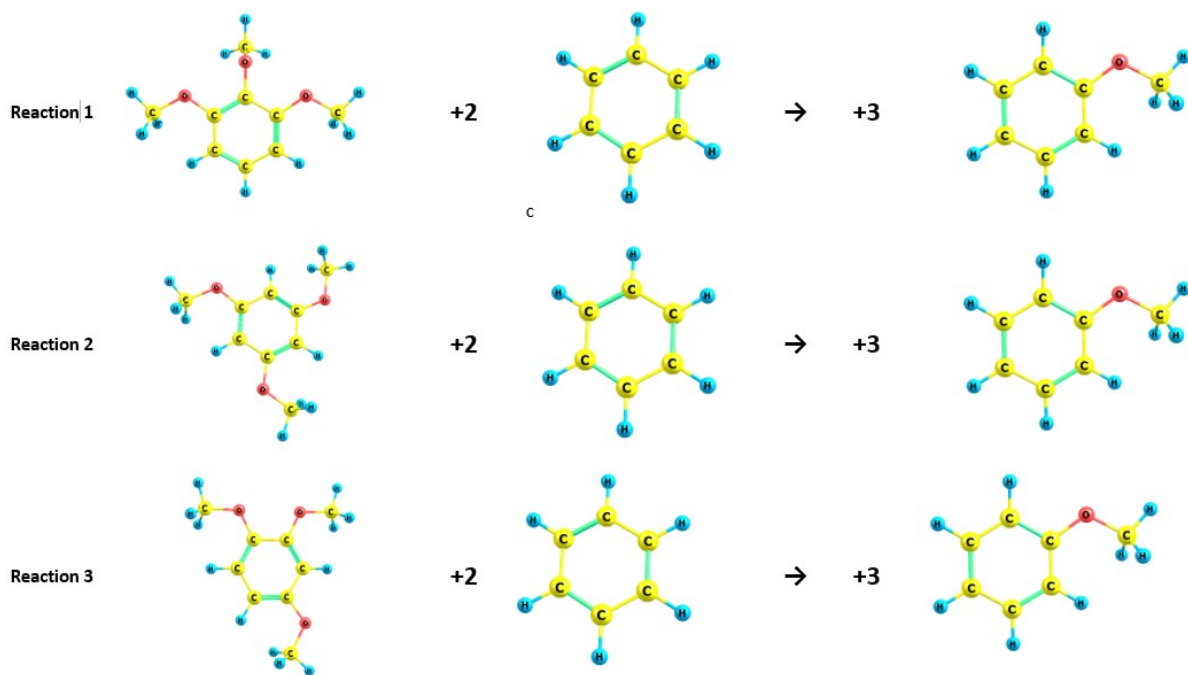

**Figure S2.** Well-balanced reactions for trimethoxy-benzenes.

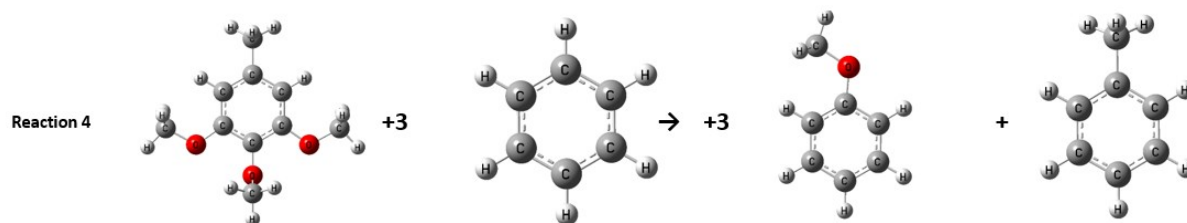

**Figure S3.** Well-balanced reaction for 3,4,5-trimethoxy-toluene.

**Table S11.** Standard molar enthalpy of formation 1,2,3-trimethoxy-benzene,  $\Delta_f H_m^\circ$ (g), kJ·mol<sup>-1</sup> (Reaction R1)

| Method   | $\Delta_f H_m^\circ$ (g)<br>(AT) | $\Delta_f H_m^\circ$ (g)<br>Reaction R1 | $\Delta_r H_m^\circ$ (g)<br>Reaction enthalpy R1 |
|----------|----------------------------------|-----------------------------------------|--------------------------------------------------|
| G4       | -355.1                           | -352.2                                  | -25.7                                            |
| G3MP2    | -356.6                           | -351.5                                  | -26.4                                            |
| M06/QZ4P | -359.8                           | -349.3                                  | -28.6                                            |

**Table S12.** Standard molar enthalpy of formation 1,2,4-trimethoxy-benzene,  $\Delta_f H_m^\circ$ (g), kJ·mol<sup>-1</sup> (Reaction R2)

| Method   | $\Delta_f H_m^\circ$ (g)<br>(AT) | $\Delta_f H_m^\circ$ (g)<br>Reaction R2 | $\Delta_r H_m^\circ$ (g)<br>Reaction enthalpy R2 |
|----------|----------------------------------|-----------------------------------------|--------------------------------------------------|
| G4       | -364.0                           | -361.0                                  | -16.9                                            |
| G3MP2    | -366.2                           | -361.1                                  | -16.8                                            |
| M06/QZ4P | -371.3                           | -360.8                                  | -17.1                                            |

**Table S13.** Standard molar enthalpy of formation 1,3,5-trimethoxy-benzene,  $\Delta_f H_m^\circ$ (g), kJ·mol<sup>-1</sup> (Reaction R3)

| Method   | $\Delta_f H_m^\circ$ (g)<br>(AT) | $\Delta_f H_m^\circ$ (g)<br>Reaction R3 | $\Delta_r H_m^\circ$ (g)<br>Reaction enthalpy R3 |
|----------|----------------------------------|-----------------------------------------|--------------------------------------------------|
| G4       | -385.2                           | -382.3                                  | 4.4                                              |
| G3MP2    | -387.3                           | -382.2                                  | 4.3                                              |
| M06/QZ4P | -393.9                           | -383.4                                  | 5.5                                              |

**Table S14.** Standard molar enthalpy of formation 3,4,5-trimethoxy-toluene,  $\Delta_f H_m^\circ$ (g), kJ·mol<sup>-1</sup> (Reaction R4)

| Method | $\Delta_f H_m^\circ$ (g)<br>(AT) | $\Delta_f H_m^\circ$ (g)<br>Reaction R4 | $\Delta_r H_m^\circ$ (g)<br>Reaction enthalpy R4 |
|--------|----------------------------------|-----------------------------------------|--------------------------------------------------|
| G4     | -386.6                           | -381.8                                  | -27.7                                            |
| G3MP2  | -388.5                           | -381.2                                  | -27.4                                            |
| G4MP2  | -381.6                           | -382.1                                  | -28.3                                            |

**Table S15**

Parameters for the Development of “Theoretical Framework” Substituents on the “Centerpieces” for Calculation of  $\Delta_f H_m^o(g)$  of Substituted Benzene Derivatives at 298.15 K (in kJ·mol<sup>-1</sup>).

| Centerpiece molecules   | $\Delta_f H_m^o(g)$ | $\Delta H(H \rightarrow R)$ |
|-------------------------|---------------------|-----------------------------|
| benzene                 | 82.9±0.9            |                             |
| toluene                 | 50.1±1.1            | <b>-32.8</b>                |
| methoxybenzene          | -70.7±1.4           | <b>-153.6</b>               |
| “theoretical framework” | $\Delta_f H_m^o(g)$ | Summation:                  |
| dimethoxy-benzene       | <b>-224.3</b>       | 82.9 + (-153.6)×2           |
| trimethoxybenzene       | <b>-377.9</b>       | 82.9 + (-153.6)×3           |
| trimethoxy-toluene      | <b>-410.7</b>       | 82.9 + (-153.6)×+(-32.8)    |
| methoxy toluene         | <b>-103.5</b>       | 82.9 + (-153.6) + (-32.8)   |

**Table S16**

Parameters for Pairwise Nearest and Non-nearest Neighbour Interactions of Substituents on the “Centerpieces” for Calculation of  $\Delta_f H_m^o(g)$  of Substituted Benzenes at 298.15 K (in kJ·mol<sup>-1</sup>).

| Compounds            | $\Delta_f H_m^o(g)$ |                         | Pairwise interactions                    |
|----------------------|---------------------|-------------------------|------------------------------------------|
|                      |                     |                         | <i>CH<sub>3</sub>O - CH<sub>3</sub>O</i> |
| 1,2-dimethoxybenzene | -210.0±2.4          | (-210.0+ <b>224.3</b> ) | 14.3                                     |
| 1,3-dimethoxybenzene | -224.8±2.6          | (-224.8+ <b>224.3</b> ) | -0.5                                     |
| 1,4-dimethoxybenzene | -216.9±2.4          | (-216.8+ <b>224.3</b> ) | 7.4                                      |
|                      |                     |                         | <i>CH<sub>3</sub>O - CH<sub>3</sub></i>  |
| 2-methoxytoluene     | -106.6±1.6          | (-106.6+ <b>103.5</b> ) | -3.1                                     |
| 3-methoxytoluene     | -102.6±5.0          | (-102.6+ <b>103.5</b> ) | 0.9                                      |
| 4-methoxytoluene     | -99.0±2.0           | (-99.0+ <b>103.5</b> )  | 4.5                                      |

**Table S17**

Analysis of the Total Amount of Pairwise Nearest and Non-nearest Neighbour Interactions of Substituents on the “Centerpieces” in Terms of  $\Delta_f H_m^o(g)$  for Trimethoxy Substituted Benzenes at 298.15 K (in kJ·mol<sup>-1</sup>).

| Compound                | $\Delta_f H_m^o(g)^a$ | Actual amount of interactions <sup>b</sup> | Theoretical amount of interactions <sup>b</sup> | $\Delta^c$ |
|-------------------------|-----------------------|--------------------------------------------|-------------------------------------------------|------------|
| 1                       | 2                     | 3                                          | 4                                               | 5          |
| 1,2,3-trimethoxybenzene | -350.6±2.4            | (-350.6+377.9)= 27.3                       | 28.1                                            | -0.8       |
| 1,2,4-trimethoxybenzene | -360.3±1.6            | (-360.3+377.9)= 17.6                       | 21.2                                            | -3.6       |
| 1,3,5-trimethoxybenzene | -382.1±1.2            | (-382.1+377.9) = -4.2                      | -1.5                                            | -2.7       |
| 3,4,5-trimethoxytoluene | -382.1±1.2            | (-382.1+377.9) = 28.6                      | 34.4                                            | -5.8       |

**Table S18.**

Parameters for the Development of “Theoretical Framework” Substituents on the “Centerpieces” for calculation of  $\Delta_l^g H_m^o$  of Substituted Benzenes at 298.15 K (in kJ·mol<sup>-1</sup>).

| Centerpiece molecules   | $\Delta_l^g H_m^o$ | $\Delta H(H \rightarrow R)$ |
|-------------------------|--------------------|-----------------------------|
| benzene                 | 33.9±0.1           |                             |
| toluene                 | 38.1±0.1           | <b>4.2</b>                  |
| methoxybenzene          | 46.4±0.3           | <b>12.5</b>                 |
| “theoretical framework” | $\Delta_l^g H_m^o$ | Summation:                  |
| dimethoxy-benzene       | <b>58.9</b>        | 33.9 + (12.5)×2             |
| trimethoxybenzene       | <b>71.4</b>        | 33.9 + (12.5)×3             |
| trimethoxy-toluene      | <b>75.6</b>        | 33.9 + (12.5)×3 + (4.2)     |
| methoxy toluene         | <b>50.6</b>        | 33.9 + (12.5) + (4.2)       |

**Table S19**

Parameters of Pairwise Nearest and Non-nearest Neighbour Interactions of Substituents on the “Centerpieces” for Calculation of  $\Delta_l^g H_m^o$  of Substituted Benzenes at 298.15 K (in kJ·mol<sup>-1</sup>).

|                      | $\Delta_l^g H_m^o$ |                       | Pairwise interactions                    |
|----------------------|--------------------|-----------------------|------------------------------------------|
|                      |                    |                       | <i>CH<sub>3</sub>O - CH<sub>3</sub>O</i> |
| 1,2-dimethoxybenzene | 64.5±0.3           | (64.5 - <b>58.9</b> ) | 5.6                                      |
| 1,3-dimethoxybenzene | 59.7±0.2           | (59.7 - <b>58.9</b> ) | 0.8                                      |
| 1,4-dimethoxybenzene | 61.6±0.2           | (61.6 - <b>58.9</b> ) | 2.7                                      |
|                      |                    |                       | <i>CH<sub>3</sub>O - CH<sub>3</sub></i>  |
| 2-methoxytoluene     | 50.2±0.4           | (50.2 - <b>50.6</b> ) | -0.4                                     |
| 3-methoxytoluene     | 52.8±0.5           | (52.8 - <b>50.6</b> ) | 2.2                                      |
| 4-methoxytoluene     | 53.3±0.4           | (53.3 - <b>50.6</b> ) | 2.7                                      |

**Table S20**

Analysis of the Total Amount of Pairwise Nearest and Non-nearest Neighbour Interactions of Substituents on the “Centerpieces” in Terms of  $\Delta_l^g H_m^o$  for Trimethoxy Substituted Benzenes at 298.15 K (in kJ·mol<sup>-1</sup>).

| Compound                | $\Delta_l^g H_m^o$ | Actual amount of interactions | Theoretical amount of interactions | $\Delta$ |
|-------------------------|--------------------|-------------------------------|------------------------------------|----------|
| 1                       | 2                  | 3                             | 4                                  | 5        |
| 1,2,3-trimethoxybenzene | 73.0±0.5           | (73.0 - <b>71.4</b> ) = 1.6   | 12.0                               | -10.4    |
| 1,2,4-trimethoxybenzene | 75.7±0.5           | (75.7 - <b>71.4</b> ) = 4.5   | 9.1                                | -4.6     |
| 1,3,5-trimethoxybenzene | 68.7±0.4           | (68.7 - <b>71.4</b> ) = -2.7  | 2.4                                | -5.1     |
| 3,4,5-trimethoxytoluene | 77.7±0.5           | (77.7 - <b>75.6</b> ) = 2.1   | 19.1                               | -17.0    |

## REFERENCES FOR ESI

- (1) Chickos J.S.; Hosseini S.; Hesse D.G.; Liebman J.F. Heat Capacity Corrections to a Standard State: a Comparison of New and Some Literature Methods for Organic Liquids and Solids. *Struct. Chem.* **1993**, *4*, 271–278.
- (2) Acree Jr. W.; Chickos J.S. Phase Transition Enthalpy Measurements of Organic and Organometallic Compounds and Ionic liquids. Sublimation, Vaporization, and Fusion Enthalpies from 1880 to 2015. Part 2. C11–C192. *J. Phys. Chem. Ref. Data.* **2017**, *46*, 013104.
- (3) Fenwick, J.O.; Harrop, D.; Head, A.J., Thermodynamic Properties of Organic Oxygen Compounds. 41. Enthalpies of formation of eight ethers. *J. Chem. Thermodyn.* **1975**, *7*, 943-954.
- (4) Emel'yanenko V.N.; Zaitsau D.H.; Shoifet E.; Meurer F.; Verevkin S.P.; Schick C.; Held C. Benchmark Thermochemistry for Biologically Relevant Adenine and Cytosine. A Combined Experimental and Theoretical Study. *J. Phys. Chem. A.* **2015**, *119*, 9680-9691.
- (5) Verevkin S.P.; Emel'yanenko V.N. Transpiration Method: Vapor Pressures and Enthalpies of Vaporization of Some Low-Boiling Esters. *Fluid Phase Equilib.* **2008**, *266*, 64–75.
- (6) Verevkin S.P.; Sazonova A.Y.; Emel'yanenko V.N.; Zaitsau D.H.; Varfolomeev M.A.; Solomonov B.N.; Zherikova K.V. Thermochemistry of Halogen-Substituted Methylbenzenes. *J. Chem. Eng. Data.* **2015**, *60*, 89-103.
- (7) Emel'yanenko V.N.; Verevkin S.P. Benchmark Thermodynamic Properties of 1,3-propanediol: Comprehensive Experimental and Theoretical Study. *J. Chem. Thermodyn.* **2015**, *85*, 111–119.
- (8) Kovats E. Gas-chromatographische Charakterisierung Organischer Verbindungen. Teil 1: Retentionsindices Aliphatischer Halogenide, Alkohole, Aldehyde und Ketone. *Helv. Chim. Acta.* **1958**, *41*, 1915–1932.
- (9) Verevkin S.P. Vapour Pressures and Enthalpies of Vaporization of a Series of the Linear n-alkyl-benzenes. *J. Chem. Thermodyn.* **2006**, *38*, 1111–1123.
- (10) Verevkin S.P.; Schick C. Substituent Effects on the Benzene Ring. Determination of the Intramolecular Interactions of Substituents in tert-alkyl Substituted Catechols from Thermochemical Measurements. *J. Chem. Eng. Data.* **2000**, *45*, 946-952.
- (11) Emel'yanenko V.N.; Verevkin S.P.; Heintz A. The Gaseous Enthalpy of Formation of the Ionic Liquid 1-butyl-3-methyl-imidazolium Dicyanoamide from Combustion Calorimetry, Vapor Pressure Measurements, and Ab Initio Calculations. *J. Am. Chem. Soc.* **2007**, *129*, 3930-3937.
- (12) Matos, M.A.R.; Miranda, M.S.; Morais, V.M.F., Calorimetric and Theoretical Determination of Standard Enthalpies of Formation of Dimethoxy- and Trimethoxybenzene Isomers, *J. Phys. Chem. A*, **2000**, *104*, 40, 9260-9265, <https://doi.org/10.1021/jp001928g> .
- (13) [www.sigmaaldrich.com/catalog/product/aldrich/t68802?lang=de&region=DE](http://www.sigmaaldrich.com/catalog/product/aldrich/t68802?lang=de&region=DE)
- (14) [www.sigmaaldrich.com/catalog/product/aldrich/227714?lang=de&region=DE](http://www.sigmaaldrich.com/catalog/product/aldrich/227714?lang=de&region=DE)
- (15) Verevkin S.P., Thermochemistry of Phenols: Quantification of the Ortho-, Para-, and Meta-interactions in Tert-alkyl Substituted Phenols. *J. Chem. Thermodyn.* **1999**, *31*, 559-585.
- (16) Hubbard W.N.; Scott D.W.; Waddington G. *Standard States and Corrections for Combustions in a Bomb at Constant Volume*, in: F.D. Rossini (ed.), *Experimental Thermochemistry*, Interscience Publishers, New York, 1956, pp. 75-128.
- (17) Olofsson G., *Assignment of Uncertainties*, in: S. Sunner, M. Månsson (Eds.), *Combustion Calorimetry: Experimental Chemical Thermodynamics*, Pergamon, New York, 1979, pp. 137–161.
- (18) Roux M.V.; Temprado M.; Chickos J.S.; Nagano Y. Critically Evaluated Thermochemical Properties of Polycyclic Aromatic Hydrocarbons. *J. Phys. Chem. Ref. Data.* **2008**, *37*, 1855-1996.

- (19) Simões R.G.; Agapito F.; Diogo H.P.; Minas da Piedade M.E. The Enthalpy of Formation of Anisole: Implications for the Controversy on the O–H Bond Dissociation Enthalpy in Phenol. *J. Phys. Chem. A*. **2014**, *118* (46), 11026-11032.
- (20) Curtiss L.A.; Redfern P.C.; Raghavachari K. Gaussian-4 Theory. *J. Chem. Phys.* **2007**, *126*, 84108-84112.
- (21) Curtiss L.A.; Redfern P.C.; Raghavachari K.; Rassolov V.; Pople J.A. Gaussian-3 Theory Using Reduced Möller-Plesset order. *J. Chem. Phys.* **1999**, *110*, 4703–4709.
- (22) Turovtsev V.V.; Orlov Yu. D.; Kaplunov I. A.; Fedina Yu. A.; Zubkov V. V. Errors of the Most Popular Functionals in the Calculation of the Electron Energy and Enthalpy of Formation of Compounds, *J. Phys. Conf. Ser.* **2019**, *1352* (1), 1352:012058. [<https://doi.org/10.1088/1742-6596/1352/1/012058>]
- (19) Simões R.G.; Agapito F.; Diogo H.P.; Minas da Piedade M.E. The Enthalpy of Formation of Anisole: Implications for the Controversy on the O–H Bond Dissociation Enthalpy in Phenol. *J. Phys. Chem. A*. **2014**, *118* (46), 11026-11032.
- (24) Varfolomeev, M.A. Abaidullina, D.I.; Solomonov, B.N.; Verevkin, S.P.; Emel'yanenko, V.N. Pairwise Substitution Effects, Inter and Intramolecular Hydrogen Bond in Methoxyphenols and Dimethoxybenzenes. Thermochemistry, Calorimetry and First Principles Calculations *J. Phys. Chem. B*, **2010**, *114*, 16503–16516.
